# Supplementary material for: Dynamics of Ecosystem Services during Forest Transitions in Reventazón, Costa Rica
Source: PLoS One. 2016 Jul 8;11(7):e0158615. doi: 10.1371/journal.pone.0158615 (PMC4938395; doi:10.1371/journal.pone.0158615)
Supplement: S3 File — (PDF) [file pone.0158615.s003.pdf]

### S3. Details on land-cover changes.

*Table 1. Proportion (in %) of each land cover for the four time periods studied (1986, 1996, 2001 and 2008).*

| Code Land cover |                                      | 1986 | 1996 | 2001 | 2008 |
|-----------------|--------------------------------------|------|------|------|------|
| 1               | Old forests                          | 39.3 | 39.5 | 40.2 | 40.8 |
| 2               | Pastures                             | 28.7 | 27.3 | 27.3 | 27.0 |
| 3               | Young forests                        | 7.4  | 8.4  | 7.5  | 7.4  |
| 4               | Sugarcane plantations                | 6.5  | 6.8  | 6.7  | 6.6  |
| 5               | Coffee plantations                   | 14.7 | 13.7 | 13.4 | 13.2 |
| 6               | Urban areas                          | 0.7  | 1.0  | 1.1  | 1.1  |
| 7               | Water bodies                         | 1.8  | 1.8  | 2.0  | 2.0  |
| 8               | Crops                                | 1.0  | 1.3  | 1.3  | 1.3  |
| 9               | Bare soil                            | 0.0  | 0.0  | 0.0  | 0.0  |
| 10              | Forest plantations                   | 0.0  | 0.0  | 0.0  | 0.3  |
| 11              | Crops under net                      | 0.0  | 0.0  | 0.1  | 0.1  |
| 12              | Rural areas planned for urbanization | 0.0  | 0.3  | 0.3  | 0.3  |
| TOTAL           |                                      | 100  | 100  | 100  | 100  |
