# Supplementary material for: Dynamics of Ecosystem Services during Forest Transitions in Reventazón, Costa Rica
Source: PLOS journal article supplement (doi:10.1371/journal.pone.0158615), 2016-07-08
Supplement: S4 (10.1371/journal.pone.0158615.s004) [file journal.pone.0158615.s004.PDF]

## S4. Results of the sub-watershed cluster analysis.

To highlight different dynamics within the study area, we defined three groups of sub-watershed based on forest area change from 1986 to 2008: large increase (in more than 3% of the area, a threshold defined arbitrarily as the 80% quantile of the distribution of the absolute values of forest area changes), moderate increase (in less than 3% of the area), and decrease or no change (in less than 3% of the area). To analyze changes in forests area, we considered all forest ecosystems described previously: old, young and planted forests.

*Table 1. Mean forest area change (in %) from 1986 to 2008 in each group identified.*

| <b>Groups</b>         | <b>Subwatershed numbers</b>  | <b>Mean forest area change (in %)</b> |
|-----------------------|------------------------------|---------------------------------------|
| Decrease or no change | 1, 9 and 11                  | -1.28                                 |
| Moderate Increase     | 3, 4, 6, 7, 8, 10, 12 and 13 | 1.16                                  |
| Large Increase        | 2 and 5                      | 10.49                                 |

The k-means algorithm was used to cluster the 13 sub-watersheds according to the changes of ES observed in these sub-watersheds between 1986 and 2008.

*Table 2: Mean changes in the levels of the six selected ES from 1986 to 2008 in each cluster identified (A: agricultural production, C: carbon, N: nitrogen retention, P: phosphorus retention, S: sediment retention, W: water yield).*

| <b>Clusters</b>                                  | <b>Subwatershed numbers</b>   | <b>A</b> | <b>C</b> | <b>N</b> | <b>P</b> | <b>S</b> | <b>W</b> |
|--------------------------------------------------|-------------------------------|----------|----------|----------|----------|----------|----------|
| Weak tradeoffs: more food, less carbon and water | 1, 7 and 9                    | 0.020    | -0.036   | 0.203    | 0.157    | 0.004    | -0.020   |
| Weak tradeoffs: more carbon, less food           | 3, 4, 6, 8, 10, 11, 12 and 13 | -0.019   | 0.017    | 0.214    | 0.135    | -0.009   | -0.004   |
| Strong tradeoffs: more carbon, less food         | 2 and 5                       | -0.156   | 0.120    | 0.206    | 0.102    | -0.030   | 0.004    |
